# Supplementary material for: Reemergence of Yellow Fever in Brazil: The Role of Distinct Landscape Fragmentation Thresholds
Source: J Environ Public Health. 2021 Jul 23;2021:8230789. doi: 10.1155/2021/8230789 (PMC8325590; doi:10.1155/2021/8230789)
Supplement: Supplementary Materials — Table S1: the dataset used for analysis. [file 8230789.f1.docx]

# Journal of Environmental and Public Health

**Re-emergence of yellow fever in Brazil: the role of distinct landscape fragmentation thresholds**

Roberto C. Ilacqua1, Antônio R. Medeiros-Sousa2, Daniel G. Ramos3, Marcos T. Obara4, Walter Ceretti-Junior2, Luis F. Mucci5, Mauro T. Marrelli2, Gabriel Z. Laporta1

1Setor de Pós-graduação, Pesquisa e Inovação, Centro Universitário da Faculdade de Medicina do ABC (FMABC), Fundação ABC, Santo André, SP, Brazil

2Departamento de Epidemiologia, Faculdade de Saúde Pública da Universidade de São Paulo (FSP-USP), São Paulo, SP, Brazil

3Coordenação Geral de Vigilância de Arboviroses, Ministério da Saúde (MS), Brasília, DF, Brazil

4Faculdade de Ceilândia, Universidade de Brasília (UNB), Brasília, DF, Brazil

5Superintendência de Controle de Endemias (SUCEN), Secretaria de Estado da Saúde, Taubaté, SP, Brazil

Correspondence should be addressed to Gabriel Z. Laporta; gabriel.laporta@fmabc.br

Table S1 – Dataset utilized for data analysis (*N*=151 municipalities).

| **state** | **municipality** | **cases** | **area** | **pop** | **forest** | **Edforest** | **Pmasc** | **age** | **Pmonkey** | **vaccine** |
| --- | --- | --- | --- | --- | --- | --- | --- | --- | --- | --- |
| TO | Palmas | 15 | 222249 | 291855 | 31.4243 | 56.5208 | 40 | 29 | 100 | 0 |
| SP | Águas da Prata | 5 | 14296.05 | 8137 | 44.2771 | 69.5458 | 100 | 35.36 | 0 | 0 |
| SP | Atibaia | 51 | 47844.63 | 141398 | 40.9314 | 83.3153 | 76.47 | 44.6 | 92.68 | 1 |
| SP | Batatais | 2 | 85037.4 | 62024 | 14.8496 | 62.3944 | 100 | 39 | 100 | 0 |
| SP | Bragança Paulista | 74 | 51248.52 | 166753 | 30.6996 | 81.9044 | 100 | 65 | 71.23 | 1 |
| SP | Caieiras | 16 | 9763.65 | 100129 | 69.7175 | 50.7013 | 100 | 49.5 | 14.29 | 1 |
| SP | Campinas | 46 | 79478.46 | 1194094 | 17.5297 | 50.8957 | 100 | 64 | 88.89 | 1 |
| SP | Caraguatatuba | 8 | 48657.42 | 119625 | 77.524 | 29.6002 | 100 | 26 | 100 | 1 |
| SP | Cotia | 10 | 32406.48 | 244694 | 58.5788 | 66.8061 | 88.89 | 39.11 | 100 | 1 |
| SP | Embu-Guaçu | 10 | 25560.37 | 68856 | 56.2105 | 83.6972 | 100 | 49.44 | 100 | 1 |
| SP | Franco da Rocha | 8 | 13277.79 | 152433 | 47.6964 | 77.238 | 100 | 38 | 100 | 1 |
| SP | Guarulhos | 28 | 31859.46 | 1365899 | 47.8186 | 42.4583 | 88.89 | 43.93 | 100 | 1 |
| SP | Ibiúna | 43 | 105852.8 | 78262 | 68.7528 | 62.0336 | 92.86 | 50.21 | 100 | 1 |
| SP | Igaratá | 4 | 29273.4 | 9483 | 49.7605 | 63.0818 | 100 | 57.33 | 100 | 1 |
| SP | Itatiba | 20 | 322227.2 | 11909 | 29.6962 | 71.3993 | 100 | 72 | 66.67 | 1 |
| SP | Jarinu | 31 | 20753.46 | 29456 | 40.9109 | 92.2617 | 90 | 45.95 | 90.48 | 1 |
| SP | Joanópolis | 2 | 37412.37 | 13098 | 54.4866 | 55.0262 | 100 | 51 | 0 | 1 |
| SP | Jundiaí | 85 | 43123.59 | 41481 | 52.0379 | 69.9258 | 100 | 55 | 86.9 | 1 |
| SP | Mairiporã | 268 | 32065.02 | 98374 | 69.4197 | 86.9798 | 79.17 | 43.61 | 70 | 1 |
| SP | Monte Alegre do Sul | 39 | 11028.78 | 7964 | 40.8766 | 85.5027 | 83.33 | 48.83 | 42.42 | 1 |
| SP | Nazaré Paulista | 6 | 32609.34 | 18346 | 59.9974 | 70.1403 | 100 | 57 | 0 | 1 |
| SP | Pariquera-Açu | 9 | 35996.22 | 19570 | 57.06 | 82.797 | 85.71 | 42.14 | 100 | 1 |
| SP | Piedade | 8 | 74738.34 | 55149 | 50.1217 | 76.8935 | 83.33 | 39.74 | 100 | 1 |
| SP | Ribeirão Preto | 2 | 65173.86 | 694534 | 6.4978 | 27.6226 | 100 | 53 | 0 | 0 |
| SP | Salto de Pirapora | 2 | 28132.02 | 44972 | 38.05 | 94.5087 | 100 | 12 | 100 | 1 |
| SP | Santa Cruz do Rio Pardo | 5 | 111468.2 | 47395 | 15.7044 | 40.3724 | 100 | 17 | 25 | 0 |
| SP | São José dos Campos | 11 | 109867.7 | 713943 | 36.7019 | 53.2928 | 77.78 | 34.67 | 100 | 1 |
| SP | São Lourenço da Serra | 5 | 18647.64 | 15667 | 81.2139 | 60.0816 | 100 | 19 | 100 | 1 |
| SP | São Miguel Arcanjo | 6 | 93171.6 | 32859 | 44.9303 | 64.8874 | 100 | 40 | 100 | 0 |
| SP | São Paulo | 200 | 152095.8 | 12176866 | 34.266 | 44.9602 | 69.7 | 43.04 | 95.81 | 1 |
| SP | São Sebastião | 8 | 39929.21 | 87596 | 89.5526 | 27.7177 | 100 | 27.33 | 100 | 1 |
| SP | Serra Negra | 2 | 20372.76 | 29001 | 34.3213 | 86.5332 | 100 | 58 | 100 | 1 |
| SP | Socorro | 4 | 44892.18 | 40648 | 18.0857 | 58.1306 | 0 | 53 | 0 | 1 |
| SP | Tapiraí | 5 | 75564.17 | 7850 | 92.666 | 20.8326 | 0 | 50 | 100 | 1 |
| SP | Taubaté | 5 | 62388.52 | 311854 | 25.5921 | 49.6364 | 100 | 40 | 100 | 1 |
| SP | Tuiuti | 26 | 12670.02 | 6808 | 19.9726 | 55.6574 | 100 | 56 | 48 | 1 |
| SP | Ubatuba | 13 | 72475.65 | 89747 | 88.7718 | 23.9555 | 90.91 | 50.73 | 100 | 1 |
| SP | Valinhos | 9 | 14860.08 | 127123 | 28.3723 | 82.869 | 100 | 32.71 | 50 | 1 |
| SC | Joinville | 2 | 112637.2 | 583144 | 71.5814 | 50.3482 | 100 | 36 | 0 | 1 |
| RJ | Angra dos Reis | 80 | 82372.59 | 200407 | 84.7493 | 28.2349 | 68.19 | 39.88 | 100 | 1 |
| RJ | Barra do Piraí | 12 | 57865.86 | 99969 | 34.609 | 68.4637 | 72.72 | 41.45 | 100 | 1 |
| RJ | Cachoeiras de Macacu | 5 | 95434.2 | 58560 | 65.3069 | 56.8667 | 66.67 | 61 | 100 | 1 |
| RJ | Duas Barras | 14 | 37544.04 | 11454 | 45.355 | 73.4705 | 84.61 | 44.08 | 100 | 1 |
| RJ | Engenheiro Paulo de Frontin | 7 | 13289.04 | 13929 | 71.1234 | 71.1812 | 100 | 49.83 | 100 | 1 |
| RJ | Guapimirim | 3 | 36083.97 | 59613 | 44.386 | 75.5646 | 100 | 25 | 50 | 1 |
| RJ | Itatiaia | 6 | 24495.21 | 31537 | 64.6091 | 48.525 | 50 | 38.25 | 50 | 1 |
| RJ | Macaé | 6 | 121868.2 | 251631 | 37.3403 | 64.1301 | 60 | 50.4 | 100 | 1 |
| RJ | Mangaratiba | 4 | 35614.98 | 43689 | 82.4445 | 35.9604 | 100 | 11.5 | 100 | 1 |
| RJ | Maricá | 14 | 36275.22 | 157789 | 39.8697 | 66.2154 | 33.33 | 40 | 27.27 | 1 |
| RJ | Miguel Pereira | 7 | 28913.76 | 25493 | 41.018 | 81.6016 | 100 | 42.8 | 100 | 1 |
| RJ | Paraty | 12 | 92486.97 | 42630 | 88.4934 | 35.9454 | 60 | 50.8 | 100 | 1 |
| RJ | Petrópolis | 5 | 79588.35 | 305687 | 63.7316 | 75.4912 | 100 | 55.75 | 100 | 1 |
| RJ | Piraí | 4 | 50514.03 | 28999 | 45.4942 | 72.7723 | 66.67 | 56.67 | 100 | 1 |
| RJ | Santa Maria Madalena | 2 | 81595.08 | 10417 | 42.861 | 58.0895 | 100 | 42 | 0 | 1 |
| RJ | Silva Jardim | 6 | 93963.06 | 21773 | 46.1564 | 43.436 | 100 | 46.6 | 0 | 1 |
| RJ | Sumidouro | 14 | 39577.05 | 15577 | 44.7898 | 95.5107 | 76.92 | 54.62 | 100 | 1 |
| RJ | Valença | 35 | 130424.1 | 76163 | 26.5421 | 66.0025 | 81.82 | 44.48 | 100 | 1 |
| RJ | Volta Redonda | 8 | 18236.88 | 271998 | 29.4786 | 66.6101 | 100 | 41 | 100 | 1 |
| PR | Antonina | 5 | 88277.49 | 21933 | 89.6014 | 29.8619 | 100 | 27 | 100 | 1 |
| PR | Morretes | 3 | 68481 | 16366 | 94.7131 | 21.914 | 100 | 64.5 | 100 | 1 |
| PR | Paranaguá | 2 | 82730.61 | 153666 | 57.153 | 27.4426 | 0 | 10 | 100 | 1 |
| PR | São José dos Pinhais | 27 | 94655.43 | 317476 | 57.9308 | 75.6914 | 0 | 62 | 100 | 1 |
| PA | Alenquer | 49 | 2362774 | 56480 | 72.9638 | 78.949 | 100 | 14.5 | 0 | 0 |
| PA | Monte Alegre | 30 | 1817603 | 57900 | 71.939 | 53.835 | 100 | 22.67 | 3.7 | 0 |
| MG | Água Boa | 2 | 132193.1 | 13600 | 48.199 | 99.6542 | 100 | 33 | 100 | 0 |
| MG | Aimorés | 14 | 134946.4 | 25193 | 11.2301 | 34.7814 | 60 | 45.4 | 0 | 0 |
| MG | Alvarenga | 9 | 27842.94 | 3973 | 31.3968 | 99.608 | 100 | 39.5 | 0 | 0 |
| MG | Antônio Carlos | 5 | 52970.31 | 11432 | 37.0733 | 73.3832 | 100 | 52.4 | 66.67 | 0 |
| MG | Belo Horizonte | 18 | 33122.25 | 2501576 | 14.0037 | 43.9825 | 100 | 79 | 70.59 | 0 |
| MG | Bom Jesus do Galho | 17 | 59293.53 | 15010 | 35.1523 | 93.3871 | 66.67 | 56.48 | 36.36 | 0 |
| MG | Caputira | 3 | 18794.88 | 9287 | 35.5056 | 92.3805 | 100 | 52 | 0 | 0 |
| MG | Caraí | 4 | 124529 | 23586 | 57.5405 | 90.2787 | 100 | 31 | 100 | 0 |
| MG | Caratinga | 44 | 126065.2 | 91503 | 19.0624 | 73.0584 | 100 | 33.5 | 97.62 | 0 |
| MG | Chalé | 5 | 21289.68 | 5709 | 29.2025 | 73.8189 | 100 | 45 | 0 | 0 |
| MG | Conceição de Ipanema | 8 | 25423.65 | 4570 | 37.539 | 81.4203 | 100 | 58 | 0 | 0 |
| MG | Durandé | 14 | 21776.31 | 7811 | 53.8595 | 94.7475 | 50 | 42.5 | 0 | 0 |
| MG | Entre Folhas | 8 | 8532.54 | 5362 | 28.7134 | 80.6876 | 100 | 49.83 | 75 | 0 |
| MG | Esmeraldas | 2 | 90885.51 | 702 | 47.2651 | 104.0258 | 0 | 53 | 100 | 0 |
| MG | Felício dos Santos | 7 | 35764.11 | 4804 | 33.2252 | 72.7098 | 100 | 44 | 0 | 0 |
| MG | Franciscópolis | 23 | 71833.32 | 5446 | 54.855 | 112.9047 | 0 | 79 | 100 | 0 |
| MG | Frei Gaspar | 22 | 62720.91 | 5891 | 41.4066 | 90.0666 | 92.31 | 39.97 | 100 | 0 |
| MG | Imbé de Minas | 32 | 19706.04 | 6865 | 43.4087 | 115.7676 | 90.91 | 41.75 | 66.67 | 0 |
| MG | Inhapim | 6 | 85949.91 | 24204 | 38.5124 | 100.4019 | 100 | 59.48 | 100 | 0 |
| MG | Ipatinga | 10 | 16499.61 | 261344 | 37.1294 | 85.9675 | 50 | 60.5 | 100 | 0 |
| MG | Itambacuri | 21 | 142197.3 | 23212 | 45.9504 | 93.2672 | 76.92 | 47.31 | 75 | 0 |
| MG | Itueta | 19 | 45288.72 | 6039 | 20.1289 | 58.8305 | 100 | 44 | 0 | 0 |
| MG | Januária | 18 | 665671.1 | 67628 | 13.5632 | 35.8456 | 100 | 52.5 | 100 | 0 |
| MG | José Raydan | 7 | 18097.29 | 4938 | 45.5767 | 111.0315 | 83.33 | 50.5 | 100 | 0 |
| MG | Juiz de Fora | 55 | 143539.7 | 564310 | 30.624 | 71.1727 | 68.29 | 53.69 | 92.86 | 0 |
| MG | Ladainha | 68 | 86802.12 | 18026 | 52.5976 | 84.365 | 79.25 | 40.97 | 80 | 0 |
| MG | Lajinha | 21 | 43234.65 | 19928 | 24.8326 | 83.1847 | 70.69 | 42.79 | 0 | 0 |
| MG | Lima Duarte | 8 | 84809.34 | 16671 | 39.8797 | 83.0594 | 85.71 | 52.14 | 100 | 0 |
| MG | Malacacheta | 7 | 72900.72 | 18700 | 42.7813 | 98.864 | 75 | 48 | 100 | 0 |
| MG | Manhuaçu | 49 | 62922.24 | 89256 | 29.0763 | 92.8208 | 90.91 | 51.52 | 63.16 | 0 |
| MG | Mar de Espanha | 2 | 37169.55 | 12725 | 33.4624 | 70.0251 | 100 | 41 | 100 | 0 |
| MG | Mariana | 3 | 119413 | 60142 | 47.13 | 73.2443 | 50 | 67.5 | 100 | 0 |
| MG | Matipó | 7 | 26728.2 | 18808 | 20.4509 | 61.8437 | 100 | 38 | 0 | 0 |
| MG | Minas Novas | 6 | 181425.2 | 31471 | 22.6828 | 90.7572 | 33.33 | 49 | 0 | 0 |
| MG | Mutum | 37 | 125182.6 | 26997 | 24.8052 | 61.4285 | 100 | 47.67 | 0 | 0 |
| MG | Nova Lima | 5 | 42881.76 | 93577 | 47.0088 | 63.2318 | 100 | 51.5 | 33.33 | 0 |
| MG | Novo Cruzeiro | 41 | 170602.5 | 31326 | 61.4636 | 84.4062 | 91.18 | 44.75 | 100 | 0 |
| MG | Peçanha | 3 | 99757.53 | 17545 | 43.2007 | 82.5345 | 100 | 31 | 100 | 0 |
| MG | Piranga | 12 | 65877.75 | 17618 | 41.2205 | 91.2199 | 90.91 | 51.64 | 100 | 0 |
| MG | Poté | 29 | 62640.72 | 16491 | 44.9005 | 96.0588 | 80 | 50.35 | 100 | 0 |
| MG | Ressaquinha | 3 | 18451.89 | 4798 | 31.7889 | 78.2554 | 100 | 60 | 50 | 0 |
| MG | Sabará | 3 | 30206.07 | 135421 | 51.0352 | 89.7058 | 100 | 74 | 0 | 0 |
| MG | Santa Maria do Suaçuí | 8 | 62481.15 | 14620 | 42.7603 | 107.5942 | 100 | 46.33 | 0 | 0 |
| MG | Santa Rita de Minas | 4 | 6824.43 | 7155 | 28.6784 | 91.9286 | 100 | 46 | 0 | 0 |
| MG | Santa Rita do Itueto | 9 | 48546.27 | 5522 | 41.8046 | 87.6135 | 100 | 51.13 | 0 | 0 |
| MG | Santana do Manhuaçu | 13 | 34799.13 | 8681 | 36.0886 | 100.387 | 33.33 | 43.33 | 0 | 0 |
| MG | São João Evangelista | 8 | 47849.22 | 15781 | 32.2192 | 81.7236 | 100 | 51 | 16.67 | 0 |
| MG | São José do Jacuri | 24 | 34537.14 | 6477 | 38.6446 | 96.9122 | 50 | 47 | 0 | 0 |
| MG | São Roque de Minas | 19 | 209853.4 | 7026 | 10.3492 | 37.8857 | 0 | 20 | 16.67 | 0 |
| MG | Setubinha | 22 | 53540.91 | 12134 | 52.68 | 104.9789 | 83.33 | 42.12 | 100 | 0 |
| MG | Simonésia | 29 | 48733.2 | 19528 | 33.5034 | 100.33 | 58.33 | 40.58 | 0 | 0 |
| MG | Teófilo Otoni | 91 | 324611.7 | 140235 | 35.6371 | 85.5427 | 94.44 | 53.57 | 91.78 | 0 |
| MG | Ubaporanga | 4 | 18933.66 | 12449 | 24.8724 | 78.0372 | 100 | 51 | 0 | 0 |
| GO | Goiânia | 28 | 73395.72 | 1495705 | 18.8883 | 47.2617 | 64.71 | 63 | 45.45 | 0 |
| ES | Afonso Cláudio | 112 | 95185.8 | 30720 | 41.5523 | 92.7611 | 60 | 38.08 | 3.92 | 1 |
| ES | Alto Rio Novo | 3 | 22767.93 | 7798 | 31.3479 | 78.3905 | 100 | 23 | 0 | 1 |
| ES | Aracruz | 3 | 142325.7 | 99305 | 40.3366 | 60.0891 | 100 | 40 | 100 | 1 |
| ES | Baixo Guandu | 22 | 91732.05 | 30862 | 20.9061 | 63.4476 | 80 | 40.13 | 0 | 1 |
| ES | Brejetuba | 16 | 34437.51 | 12381 | 56.5332 | 93.7089 | 100 | 44.5 | 0 | 1 |
| ES | Cachoeiro de Itapemirim | 2 | 87856.2 | 207324 | 38.8405 | 77.1876 | 100 | 38 | 100 | 1 |
| ES | Cariacica | 27 | 27975.51 | 378603 | 49.791 | 66.0889 | 100 | 39.4 | 45.45 | 1 |
| ES | Castelo | 14 | 66438.54 | 37317 | 45.8579 | 92.3947 | 83.33 | 47 | 0 | 1 |
| ES | Colatina | 25 | 141669.5 | 121580 | 34.728 | 79.3873 | 90 | 43 | 60 | 1 |
| ES | Conceição do Castelo | 31 | 36945.27 | 12638 | 59.6264 | 79.185 | 85.71 | 47.88 | 0 | 1 |
| ES | Domingos Martins | 214 | 122847.6 | 33711 | 57.5351 | 87.1358 | 75 | 43.5 | 31.05 | 1 |
| ES | Guarapari | 31 | 59439.51 | 122982 | 50.7093 | 70.7817 | 100 | 68 | 73.33 | 1 |
| ES | Ibatiba | 72 | 24076.35 | 25732 | 38.2693 | 97.2868 | 81.25 | 47.75 | 0 | 1 |
| ES | Irupi | 22 | 18476.91 | 13226 | 46.3631 | 101.819 | 100 | 37.25 | 0 | 1 |
| ES | Itaguaçu | 23 | 53156.16 | 14109 | 40.9088 | 91.4648 | 75 | 48.75 | 10.53 | 1 |
| ES | Itarana | 52 | 29880.72 | 10619 | 27.4337 | 72.6217 | 80 | 51.51 | 8.51 | 1 |
| ES | Laranja da Terra | 13 | 45853.47 | 10961 | 47.0661 | 99.2758 | 75 | 50 | 0 | 1 |
| ES | Linhares | 7 | 350228.9 | 170364 | 31.7249 | 68.3168 | 100 | 34 | 50 | 1 |
| ES | Marechal Floriano | 49 | 28539.72 | 16464 | 68.6302 | 83.8799 | 89 | 40.31 | 0 | 1 |
| ES | Marilândia | 4 | 30894.93 | 12700 | 38.4462 | 72.2643 | 100 | 26 | 66.67 | 1 |
| ES | Muniz Freire | 9 | 67988.7 | 17613 | 38.3388 | 84.3383 | 100 | 57.6 | 0 | 1 |
| ES | Pancas | 19 | 83004.66 | 23059 | 25.8729 | 73.9625 | 100 | 58 | 28.57 | 1 |
| ES | Santa Leopoldina | 58 | 71799.12 | 12300 | 61.5954 | 85.7768 | 72.97 | 42.89 | 33.33 | 1 |
| ES | Santa Maria de Jetibá | 84 | 73562.13 | 39849 | 57.5335 | 90.0573 | 78.58 | 47.11 | 91.43 | 1 |
| ES | Santa Teresa | 62 | 68311.17 | 23392 | 52.0772 | 92.0472 | 88.89 | 51 | 43.4 | 1 |
| ES | São Mateus | 4 | 233753 | 128542 | 36.6549 | 60.5804 | 0 | 17.5 | 100 | 1 |
| ES | São Roque do Canaã | 7 | 34197.39 | 12318 | 37.9574 | 106.3678 | 60 | 51.15 | 0 | 1 |
| ES | Serra | 34 | 55149.48 | 507598 | 35.0568 | 85.1758 | 72.73 | 32.8 | 78.26 | 1 |
| ES | Vargem Alta | 13 | 41374.44 | 21207 | 55.9115 | 84.5863 | 66.67 | 33 | 0 | 1 |
| ES | Venda Nova do Imigrante | 60 | 185999.9 | 24800 | 66.4897 | 83.8152 | 33.33 | 47 | 68.42 | 1 |
| ES | Viana | 23 | 31270.14 | 76954 | 26.3345 | 58.3055 | 60 | 52.2 | 27.78 | 1 |
| ES | Vitória | 12 | 8799.21 | 358267 | 27.7532 | 44.046 | 50 | 60 | 0 | 1 |
| DF | Brasília | 25 | 578832.2 | 2974703 | 15.0703 | 46.7926 | 100 | 36 | 95.24 | 0 |
